# Supplementary material
Source: publisher site journal article supplement (https://www.dovepress.com/get_supplementary_file.php?f=240990.docx)
Supplement: Supplementary file 1 [file get_supplementary_file.php]

| Table S1. HER2 status in primary or metastatic tumor tissues and plasma of all included patients (n = 49). | | | | | | |
| --- | --- | --- | --- | --- | --- | --- |
| Case number | Primary tumor tissues | |  | Metastatic tumor tissues | | Plasma HER2 copy number  (NGS) |
| Score  (IHC) | Amplification  (FISH) | Score  (IHC) | Amplification  (FISH) |
| 1 | 3+ | + |  |  |  | 2.67 |
| 2 | 3+ |  |  | 3+ |  | 2.23 |
| 3 | 2+ | + |  |  |  | 2.37 |
| 4 | 3+ |  |  | 2+ | + | 1.99 |
| 5 | 3+ |  |  |  |  | 2.39 |
| 6 | 2+~3+ | + |  |  |  | 12.79 |
| 7 | 3+ |  |  |  |  | 10.08 |
| 8 | 3+ |  |  | 3+ |  | 5.77 |
| 9 | 3+ | + |  |  |  | 2.41 |
| 10 | 3+ |  |  | 3+ |  | 9.94 |
| 11 | 3+ |  |  |  |  | 2.23 |
| 12 | 2+ | − |  | 3+ |  | 15.55 |
| 13 | 3+ |  |  | 3+ |  | 2.28 |
| 14 | 2+~3+ | + |  |  |  | 1.89 |
| 15 | 3+ |  |  |  |  | 4.79 |
| 16 |  |  |  | 3+ |  | 4.82 |
| 17 | 3+ |  |  |  |  | 2.19 |
| 18 | 3+ |  |  |  |  | 2.21 |
| 19 | 3+ |  |  |  |  | 3.22 |
| 20 | 3+ |  |  |  |  | 2.46 |
| 21 | 3+ |  |  | 3+ |  | 2.24 |
| 22 |  |  |  | 3+ |  | 8.90 |
| 23 | 3+ |  |  |  |  | 4.69 |
| 24 | 3+ |  |  | 3+ |  | 2.12 |
| 25 | 3+ |  |  | 3+ |  | 1.96 |
| 26 | 3+ |  |  |  |  | 6.55 |
| 27 | 3+ |  |  | 3+ |  | 2.33 |
| 28 | 3+ |  |  |  |  | 5.64 |
| 29 | 3+ |  |  |  |  | 23.86 |
| 30 |  |  |  | 3+ |  | 5.86 |
| 31 | 3+ |  |  |  |  | 4.14 |
| 32 | 2+ | + |  |  |  | 1.92 |
| 33 | 3+ |  |  | 3+ |  | 1.97 |
| 34 | 3+ |  |  |  |  | 1.94 |
| 35 | 3+ |  |  |  |  | 11.15 |
| 36 | 3+ |  |  | 3+ |  | 4.50 |
| 37 |  |  |  | 2+ | + | 1.91 |
| 38 | 3+ |  |  | 3+ |  | 2.27 |
| 39 |  |  |  | 3+ |  | 2.24 |
| 40 | 3+ |  |  |  |  | 2.97 |
| 41 | 3+ |  |  |  |  | 18.63 |
| 42 | 2+~3+ | + |  |  |  | 2.06 |
| 43 |  |  |  | 3+ | + | 2.17 |
| 44 | 2+ | + |  | 3+ |  | 2.22 |
| 45 | 3+ | + |  |  |  | 8.13 |
| 46 |  |  |  | 3+ |  | 11.44 |
| 47 | 2+ | + |  |  |  | 9.47 |
| 48 | 3+ |  |  |  |  | 9.37 |
| 49 | 2+ | + |  |  |  | 2.59 |
| Abbreviations: IHC: Immunohistochemistry; FISH: Fluorescence in situ hybridization; NGS: Next-generation sequencing | | | | | | |
